# Supplementary material for: Synthesis of Lignin-based Phenol Terminated Hyperbranched Polymer
Source: MDPI journal article supplement (doi:10.3390/molecules24203717), 2019-10-16
Supplement: s1 [file s1]

# Synthesis of lignin-based phenol terminated hyperbranched polymer

Lionel Longe <sup>1</sup>, Gil Garnier <sup>2,\*</sup> and Kei Saito <sup>1,\*</sup>

<sup>1</sup> Monash University, School of Chemistry, Bioresource Processing Research Institute of Australia (BioPRIA), Clayton 3800, Australia

<sup>2</sup> Monash University, Department of Chemical Engineering, Bioresource Processing Research Institute of Australia (BioPRIA) Clayton 3800, Australia

\* Correspondence: [kei.saito@monash.edu](mailto:kei.saito@monash.edu) ; [gil.garnier@monash.edu](mailto:gil.garnier@monash.edu)

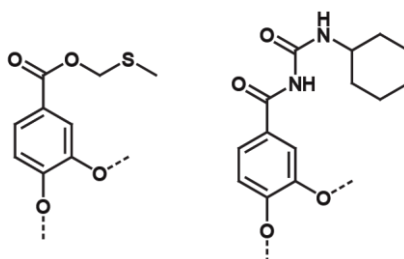

**Figure S2:** Carboxylic acid can react with activated DMSO or bind with DHU to form methylthiomethyl ester (left) or *N*-acylurea (right) structures

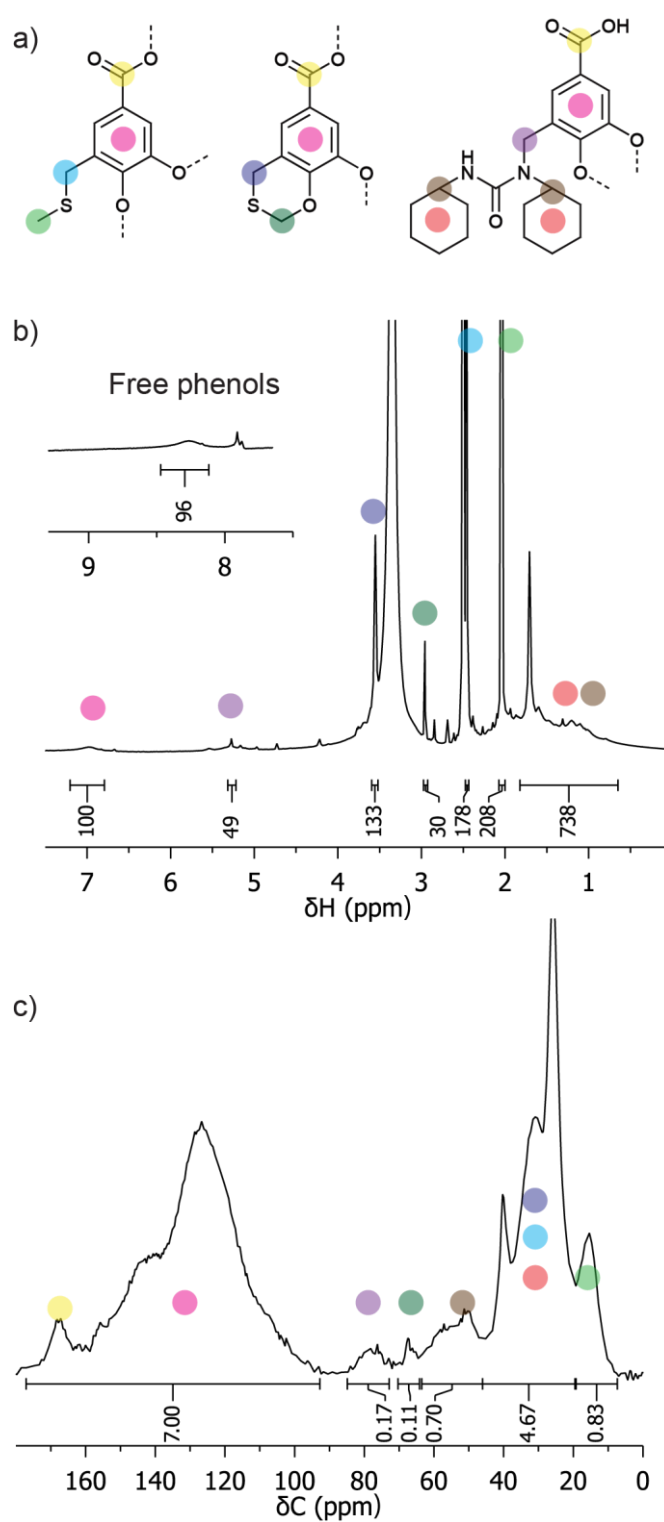

**Figure S1:** a) Three different structures that can arise from DMSO activation by DCC and reaction with PA b)  $^1\text{H}$  NMR of PA-polymer highlighting evidence of side reactions in  $\text{d}_6\text{-DMSO}$  c)  $^{13}\text{C}$  NMR of PA-polymer in  $\text{d}_6\text{-DMSO}$

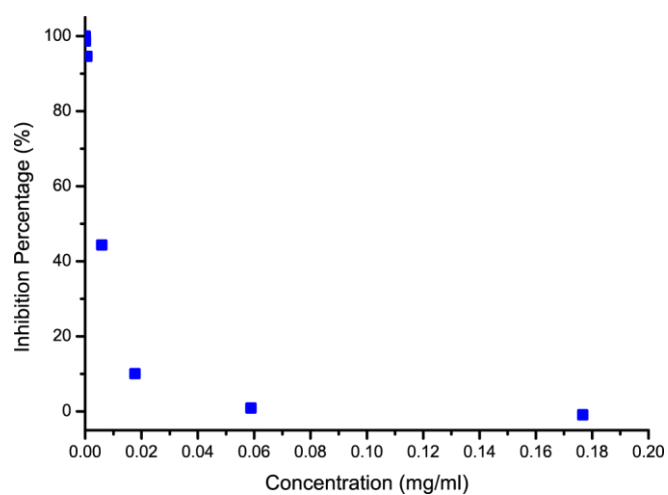

**Figure S3:** Inhibition percentage of ascorbic acid versus concentration. Measured by bleaching of DPPH at 515 nm during radical scavenging assays<sup>1</sup>

**Table S1:** Antiradical efficacy of ascorbic acid compared to literature

|                   | EC <sub>50</sub> (mg/ml) | Antiradical efficacy (mmol) <sup>a</sup> |
|-------------------|--------------------------|------------------------------------------|
| ascorbic acid     | 0.0052                   | 12.7                                     |
| ascorbic acid [1] | /                        | 12.0                                     |

<sup>a</sup>: DPPH equivalents per gram of material

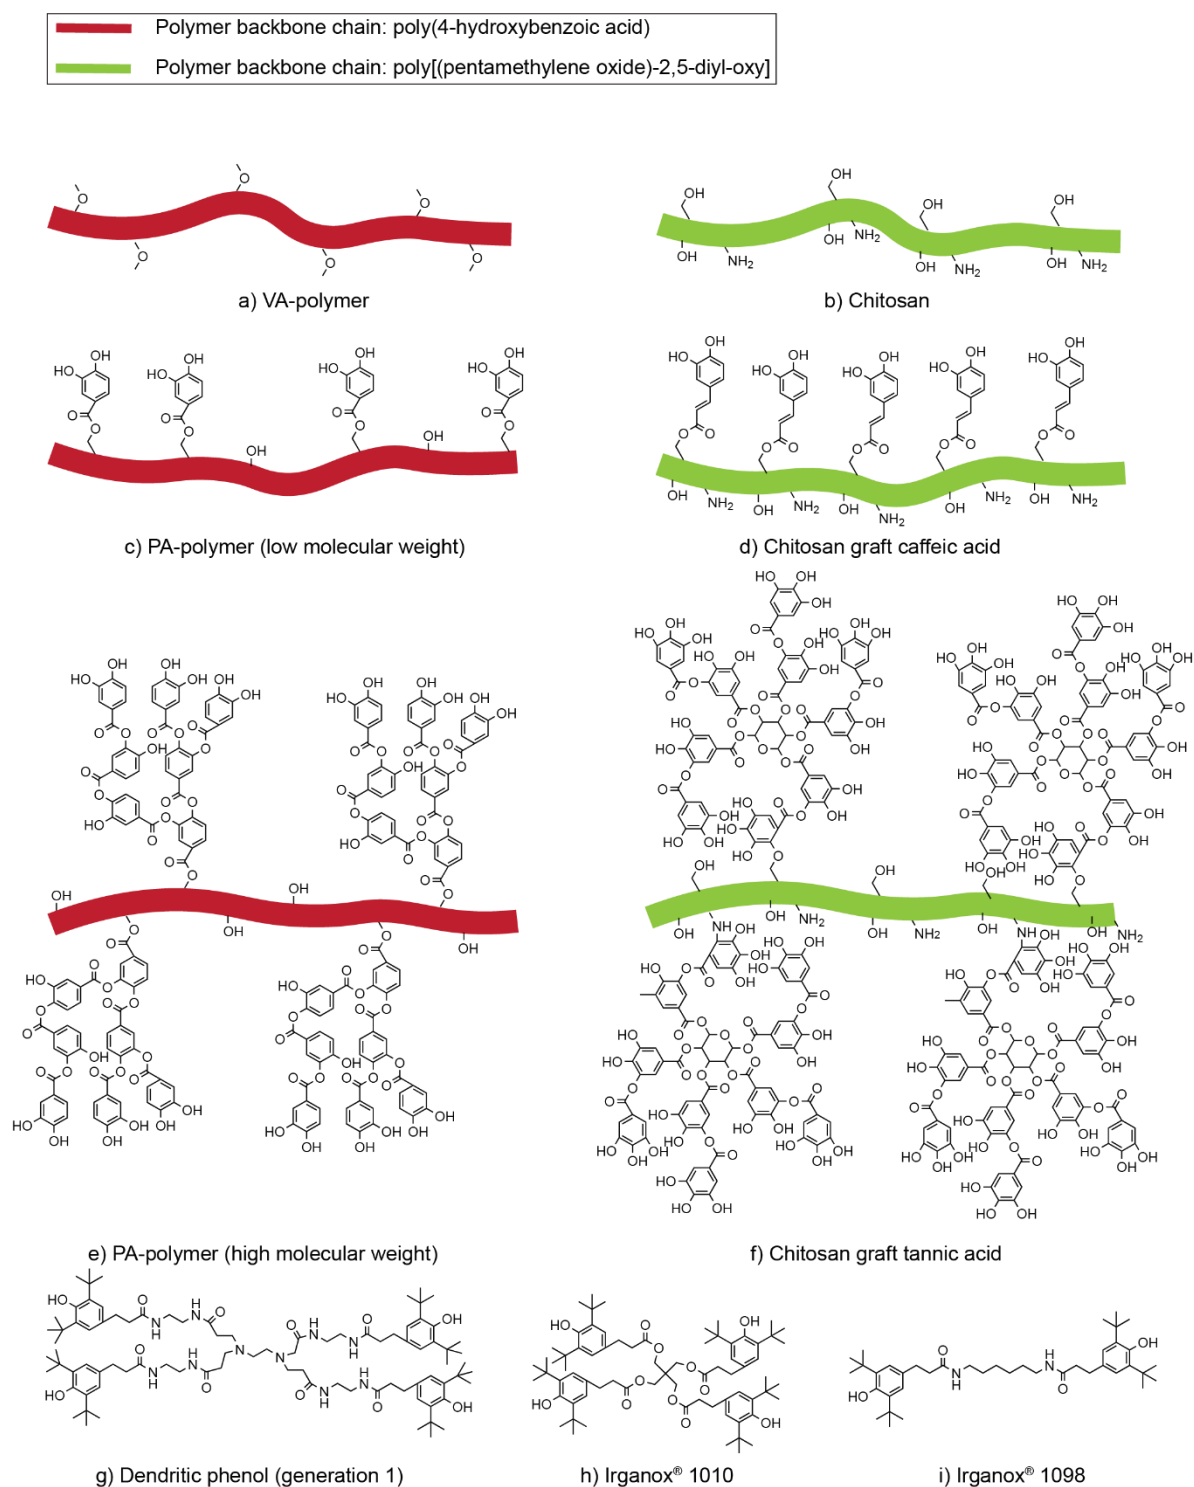

**Figure S4:** Structure of synthesised polymers (a, c, e) and literature (b, c, f, g) and commercially available (h, i) antioxidant.

## References

1. Omidi, S., Kakanejadifard, A. Modification of chitosan and chitosan nanoparticle by long chain pyridinium compounds: Synthesis, characterization, antibacterial, and antioxidant activities. *Carbohydr. polym.*, **2019** *15*; 477-485

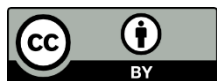

© 2019 by the authors. Submitted for possible open access publication under the terms and conditions of the Creative Commons Attribution (CC BY) license (<http://creativecommons.org/licenses/by/4.0/>).
